# 1 Human naïve stem cell models reveal the role of FGF in hypoblast specification in the human 2 embryo

3

4 Anish Dattani<sup>1,5</sup>, Elena Corujo-Simon<sup>2</sup>, Arthur Radley<sup>1,3</sup>, Tiam Heydari<sup>4</sup>, Yasaman Taheriabkenar<sup>1</sup>,  
5 Francesca Carlisle<sup>1</sup>, Simeng Lin<sup>5</sup>, Jonathan Mill<sup>5</sup>, Peter Zandstra<sup>4</sup>, Jennifer Nichols<sup>2</sup>, Ge Guo<sup>1,5\*</sup>.

6

7 1. Living Systems Institute, University of Exeter, United Kingdom

8 2. MRC Human Genetics Unit, Institute of Genetics and Cancer, University of Edinburgh, Western  
9 General Hospital, United Kingdom

10 3. Current address: Developmental Dynamics Laboratory, The Francis Crick Institute, United Kingdom

11 4. Michael Smith Laboratories, School of Biomedical Engineering, University of British Columbia,  
12 Vancouver, British Columbia, Canada,

13 5. Department of Clinical & Biomedical Sciences, University of Exeter Medical School, Faculty of Health  
14 and Life Sciences, University of Exeter, United Kingdom

15 \* Corresponding author: Ge Guo, [g.guo@exeter.ac.uk](mailto:g.guo@exeter.ac.uk)

16

## 17 SUMMARY

18 The hypoblast is an essential extra-embryonic tissue set aside within the inner cell mass early in  
19 mammalian embryo development, in the blastocyst. Research with human embryos is challenging.  
20 Thus, stem cell models that reproduce hypoblast differentiation provide valuable alternatives. We show  
21 here that human naïve PSC to hypoblast differentiation proceeds via reversion to a transitional ICM-  
22 like state, from which hypoblast emerges in concordance with the trajectory in human blastocysts. We  
23 identified a window when fibroblast growth factor (FGF) signalling is critical for hypoblast specification.  
24 Revisiting FGF signalling in human embryos revealed that inhibition in the early blastocyst suppresses  
25 hypoblast formation. *In vitro*, the induction of hypoblast is synergistically enhanced by limiting  
26 trophoctoderm and epiblast fates. This finding revises previous reports and establishes a conservation  
27 in lineage specification between mouse and human. Overall, this study demonstrates the utility of  
28 human naïve PSC-based models in elucidating mechanistic features of early human embryogenesis.

29

## 30 INTRODUCTION

31 At the onset of early human embryogenesis, a fertilised zygote undergoes continuous cell division,  
32 cellular diversification, and spatial organisation to form a hollow spherical structure, the blastocyst. The  
33 blastocyst consists of three primary lineages, the epiblast, trophoctoderm, and hypoblast, which will  
34 develop into the embryo proper, placenta, and yolk sac. Studies in mice have established a model of  
35 sequential lineage segregation during pre-implantation embryogenesis. This begins with the first  
36 lineage segregation, which sets apart the extraembryonic trophoctoderm from the inner cell mass  
37 (ICM)<sup>1-3</sup> and is followed by the second lineage segregation when the ICM differentiates into naïve  
38 epiblast and hypoblast. Morphological observation, immunostaining, and recent advances in single-cell  
39 transcriptome analysis of human embryos suggest that the sequential lineage segregation model  
40 broadly stands in human<sup>4-6</sup>. The segregation of trophoctoderm in human begins around day 4 after  
41 fertilisation (dpf) in the morula, followed by hypoblast lineage segregation around dpf 5/ 6 in the inner

42 cell mass of blastocyst. Cross-species comparative studies have also revealed both conserved and  
43 human-specific features of lineage specification<sup>7-9</sup>. However, due to limited access to human embryos,  
44 applicable approaches, and ethical considerations, knowledge of the regulatory mechanisms controlling  
45 human hypoblast lineage segregation is fragmentary.

46

47 Human pluripotent stem cells and embryo models can be valuable tools to study cell fate specification.  
48 Human naïve pluripotent stem cells (naïve PSCs) display similarity to the epiblast in 6/7 dpf  
49 blastocysts<sup>10-13</sup>. We found that human naïve PSCs maintained in PXGL medium retain a greater  
50 degree of developmental plasticity compared to mouse ESC counterparts<sup>14,15</sup>. Inhibition of MEK/ERK  
51 (PD0325901) and Activin/Nodal signalling (A83-01) enables naïve PSCs to differentiate to  
52 trophectoderm<sup>14</sup>. Interestingly, one day exposure to PD0325901 and A83-01 yielded a mixed cell culture  
53 comprising all three lineages in the blastocyst, including a small population of hypoblast-like cells<sup>14</sup>.  
54 This cellular plasticity has been exploited to form three-dimensional organoids resembling blastocysts,  
55 called blastoids, that share morphological and transcriptomic similarity to the pre-implantation embryo<sup>16-</sup>  
56 <sup>18</sup>. Signalling pathways involved in trophectoderm specification have been described<sup>14,15,19</sup> but the naïve  
57 PSC to hypoblast differentiation path has not been properly characterised. Furthermore, a key question  
58 remains as to how the *in vitro* differentiation process relates to hypoblast lineage development in the  
59 embryo. Here, we delineate the *in vitro* naïve PSC to hypoblast differentiation trajectory and compare  
60 it with embryo lineage segregation. We also explore the role of FGF signalling, which is critical for  
61 hypoblast specification in mouse, but has previously been suggested to be less important in human.

62

## 63 RESULTS

### 64 Initial MEK/ERK and Activin/Nodal inhibition enables hypoblast differentiation from naïve PSCs.

65 We have previously shown that human nPSCs differentiate mainly (>60%) to trophectoderm over three  
66 days continuous culture in N2B27 basal medium containing MEK/ERK inhibitor (PD0325901) and  
67 Activin/Nodal inhibitor (A83-01)<sup>14</sup>. In contrast, one day in PDA83 followed by N2B27 alone yielded a  
68 mixed culture containing a small population of hypoblast cells<sup>14</sup>. We used this adherent nPSC  
69 differentiation to investigate the signalling requirements for hypoblast differentiation. To this end, we  
70 generated an OCT4-eGFP and SOX17-tdTomato knock-in double reporter naïve iPSC cell line, niPSC-  
71 OS1 (Figure S1A,B). niPSC-OS1 cells expressed the pluripotency marker OCT4-GFP in PXGL<sup>10</sup>, but  
72 few, if any, SOX17-tdTomato positive cells were observed during self-renewal (Figure S1C). SOX17-  
73 tdTomato positive cells became readily visible under fluorescence microscopy in differentiation (Figure  
74 1A, B). We quantified reporter expression by flow cytometry over the course of the three days of  
75 differentiation in either continuous PDA83 (PA condition) or one day in PDA83 with release into N2B27  
76 (PA-N condition) (Figure 1A). The PA condition predominantly gave rise to reporter negative cells with  
77 a minor population of OCT4 positive cells. Little or no SOX17-tdTomato expression was recorded  
78 (Figure 1C, Figure S1D). The double negative cells expressed the trophectoderm marker GATA3  
79 (Figure S1E). In the PA-N condition, SOX17-tdTomato expression emerged after 24 hours in N2B27  
80 (Figure S1F). Typically, after 3 days of culture in PA-N, we observed a mixed culture with ~20% SOX17-  
81 tdTomato+, ~60% OCT4-GFP+ and ~20% double-negative cells (Figure 1C). Immunofluorescence (IF)

82 and reporter expression confirmed the presence of pluripotency, hypoblast, and trophectoderm lineage  
83 markers in the three subpopulations in PA-N cultures (Figure S1G). Importantly, when plated directly  
84 into N2B27 without PDA83 exposure, the culture largely remained OCT4-eGFP positive with only ~1%  
85 of SOX17-tdTomato+ cells (Figure 1D), indicating that exposure to PDA83 is important for both  
86 trophectoderm and hypoblast specification.

87

88 We performed single-cell transcriptome analysis across the three-day differentiation timecourse in PA  
89 and PA-N conditions to obtain information on the differentiation trajectories. Uniform manifold  
90 approximation and projection (UMAP) visualisation showed continuous progression of three distinct  
91 fates expressing trophectoderm, hypoblast or formative epiblast markers respectively (Figure 1E, F).  
92 Consistent with our previous reporter profile, continuous PA predominantly induces trophectoderm  
93 differentiation (Figure 1E,F)<sup>14</sup>. By contrast, cells in PA-N differentiated to all three fates: a major fraction  
94 of cells downregulated expression of naïve epiblast markers, KLF4, KLF5, and TFCEP2L1 and acquired  
95 expression of later epiblast markers, SFRP2, ETV4, and ETV5, indicative of early formative transition  
96 (Figure 1E,F, S1H). The remaining cells diverged along the extraembryonic fates: one merged towards  
97 the trophectoderm population differentiated in PA (Figure 1E,F); the second progressively upregulated  
98 hypoblast markers GATA6, PDGFRA, GATA4 and FOXA2 (Figure 1E,F).

99

#### 100 **In vitro hypoblast differentiation resembles the emergence of nascent hypoblast in the embryo.**

101 We sought to compare the in vitro differentiation path with hypoblast formation in embryo development.  
102 We took advantage of a recent high-resolution embryo single-cell UMAP embedding<sup>4</sup>. This integrated  
103 embedding utilises entropy sort feature weighting (cESFW) for feature selection (3012 genes). The data  
104 covers pre-implantation (dpf 3 to 7) to in vitro cultured post-implantation (dpf 8 to 14) embryos (Figure  
105 2A). The UMAP displays a continuous trajectory for formation of hypoblast (Figure 2B). Following the  
106 segregation of trophectoderm, ICM cells reach a branch point at dpf 5/6 expressing both ICM (NANOG,  
107 LAMA4) and early hypoblast (PDGFRA, GATA6) markers<sup>5</sup>. These cells resolve to either NANOG  
108 negative nascent hypoblast, or GATA6 negative nascent epiblast. The nascent hypoblast cells at dpf  
109 6/7 begin to express FOXA2 and GATA4, two markers expressed exclusively in the hypoblast lineage  
110 in the pre-implantation blastocyst. The hypoblast continues towards hypoblast derivatives in extended  
111 culture samples (dpf 8-14 cells) (Figure 2A), with upregulation of APOB, PODXL, HABP2, which have  
112 been shown to be expressed in yolk-sac endoderm (Figure 2B)<sup>20,21</sup>. The definitive endoderm, which  
113 emerges during post-implantation gastrulation stage embryogenesis, shares many markers, such as  
114 SOX17, GATA6, FOXA2, with the hypoblast lineage (Figure S2A). We therefore took advantage of a  
115 recent scRNA-seq resource of a ~dpf19/cs7 gastrulation stage embryo<sup>22</sup> to identify genes that are either  
116 lowly or non-expressed in definitive endoderm but are present in hypoblast, such as PDGFRA, RSPO3,  
117 HNF4A, LGALS2 (Figure 2B, S2B). These genes all show significant expression in nPSC-derived  
118 hypoblast (Figure S2C).

119

120 We projected the in vitro differentiation time course onto the embryo embedding based on transcriptome  
121 similarity over the 3012 gene set<sup>4</sup> (Figure 2C). As expected, most naïve PSCs in PXGL position over

122 dpf 6/7 naïve epiblast. The initial 24h of PDA83 treatment did not change this placement. Releasing  
123 into N2B27, however, saw a sub-population of cells shift to the epiblast/hypoblast branching point within  
124 24 hours and reach the dpf 6/7 nascent blastocyst stage after 48 hours. In the embryo embedding, the  
125 nascent hypoblast emerges from a cluster of cells expressing NANOG, PDGFRA and GATA6. By  
126 immunofluorescence, we confirmed widespread co-expression of NANOG and GATA6 protein, as well  
127 as the presence of a subpopulation of triple-positive NANOG/GATA6/PDGFRA cells following release  
128 into N2B27 (Figure 2E). Moreover, NANOG/GATA6 double positive cells had low-mid expression of  
129 NANOG. These observations are consistent with previous descriptions of a mutually antagonistic  
130 interaction between these transcription factors in the mouse ICM<sup>23,24</sup>. Few cells cultured in PXGL co-  
131 express NANOG/GATA6 with no PDGFRA expression detected (Figure 2D). These results suggest  
132 that naïve PSC to hypoblast differentiation in PA-N proceeds via reversion to the epiblast/hypoblast  
133 branching stage of ICM.

134

### 135 **Naïve PSC to hypoblast differentiation requires FGF signalling.**

136 The preceding results show that MEK/ERK inhibition initially enables hypoblast differentiation potential  
137 of naïve PSCs, but the inhibition must be relieved for specification to occur. In the mouse ICM, the  
138 FGF/ERK/GATA6 signalling axis plays an instructive role in specifying hypoblast fate<sup>25–29</sup>. The FGF  
139 expressing cells activate FGF signalling in receptor-expressing cells, which leads to ERK-dependent  
140 upregulation of GATA6, downregulation of NANOG, and initiation of the hypoblast specification  
141 program. We surveyed FGF receptor and ligand expression in human embryo data and PA-N  
142 differentiation time course. In embryos, FGFR1 and FGFR2 are broadly expressed in ICM, epiblast,  
143 and hypoblast. Low expression of the FGF ligands, FGF4, was detected in ICM and followed by a  
144 prominent upregulation in nascent epiblast cells. This expression pattern resembles the restricted  
145 FGF4 expression in mouse ICM and epiblast<sup>30,31</sup>. Human naïve PSCs express FGF2 and FGF4 but  
146 lack an appreciable expression level of FGF receptors (Figure S3A). In vitro hypoblast differentiation is  
147 associated with the downregulation of FGF4/FGF2 ligands and upregulation of FGF receptors as well  
148 as GATA6 and PDGFRA upon release from PDA83 (Figure S3A).

149

150 We directly examined the function of FGF signalling during PA-N differentiation. We applied a FGF  
151 receptor inhibitor PD173074 (PD17) to inhibit the activation of FGF signalling and assayed hypoblast  
152 differentiation efficiency by OCT4-eGFP/SOX17-tdTomato reporter expression. We added PD17 either  
153 immediately following PDA83 induction (PA-PD17) or delayed for 24 hours after PDA83 (PA-N-PD17).  
154 We thus aimed to investigate FGF function at two hypoblast differentiation stages – during the  
155 epiblast/hypoblast branch point (PA-17) or after the branch point (PA-N-PD17) (Figure 3A). Flow  
156 cytometry revealed a dramatic reduction of SOX17-tdTomato + population from ~14% to ~2% in PA-  
157 PD17 condition (Figure 3B,C). However, delayed FGF inhibition in PA-N-PD17 condition failed to  
158 effectively block SOX17-tdTomato expression, as only a small reduction in SOX17-tdTomato  
159 expressing cells, from ~14% to 11%, was recorded (Figure 3B,C), indicating that most cells released  
160 for 24 hrs in N2B27 had already been specified to hypoblast fate, and the establishment of FOXA2+  
161 GATA4+ nascent hypoblast cells is not dependent on FGF signalling. These results point out that FGF



162 signalling is crucial in initiating hypoblast lineage at the epiblast/hypoblast branch point but is not  
163 required for later progression.

164

### 165 **Hypoblast formation in blastoids also requires FGF/MEK/ERK signalling**

166 We and others have previously reported the formation of a 3D blastocyst model, the blastoid, from naïve  
167 PSCs<sup>16,17</sup>. Immunostaining and single cell transcriptome analysis revealed that the fully expanded  
168 blastoid contains hypoblast cells<sup>16,17</sup>. However, the dynamics of hypoblast lineage segregation in the  
169 blastoid have not been described. We examined hypoblast lineage marker expression by  
170 immunofluorescence staining over the course of blastoid formation. Blastoids were formed by clustering  
171 naïve PSCs in non-adherent U-shaped wells in trophoctoderm inductive PDA83 medium for 2 days,  
172 followed by one day of A83 treatment, and then one day of N2B27 alone (Figure 3D). We saw  
173 widespread upregulation of GATA6 after 48 hours in PDA83 (Figure S3B). Following medium exchange  
174 to A83, the early hypoblast marker PDGFRA appeared in some inner cells at 60 hrs and was widespread  
175 by 72 hours (Figure 3E). FOXA2 was detected later than PDGFRA, matching the sequence of activation  
176 observed in the blastocyst<sup>5</sup>. Moreover, FOXA2-positive cells were almost always positioned beneath  
177 the OCT4-positive epiblast population, indicating that this marker appears during or after spatial  
178 segregation of the hypoblast. The number of FOXA2+ cells was variable between blastoids. We  
179 quantified OCT4+ epiblast cells and FOXA2+ hypoblast cells in 15 blastoids at time points during  
180 blastoid formation. We saw sporadic FOXA2 in a minority of blastoids at 60 hours (Figure 3F). Over the  
181 following 2 days, the number of FOXA2 cells increased. By 96 hrs all blastoids examined contained  
182 FOXA2-positive cells, comprising from ~2% to ~25% of total inside cells.

183

184 We investigated whether FGF signalling underpins hypoblast formation in blastoids. We made blastoids  
185 from niPSC-OS1 and showed that inhibiting FGF signalling early in PD17, after release from PDA83,  
186 abolished nearly all SOX17-tdTomato+ cells in blastoids examined at 96 hrs (Figure 3G,H, S4B). 24  
187 hours of delay in application of PD17 showed a reduced effect. 35 of 36 blastoids contained bright  
188 SOX17-tdTomato+ cells (Figure 3G,H, S4A). Likewise, we made blastoids using HNES1  
189 GATA3:mkO2 cells and similarly showed that inhibiting FGF signalling directly after release from  
190 PDA83, abolished nearly all FOXA2+ hypoblast cells in blastoids (Figure 3I, J). Delayed application of  
191 PD17 led to a mild reduction in FOXA2+ (Figure 3I, J). In mouse, FGF promotes hypoblast specification  
192 via activation of MEK/ERK signaling<sup>32</sup>. We examined hypoblast formation in niPSC-OS1 blastoids  
193 subjected to MEK/ERK inhibition with PD03 following release from PDA83. We found that 2-3 uM PD03  
194 impeded Sox17-tdTomato+ expression effectively (Figure 3G,H, S4B). However, lower concentrations  
195 of PD03 (1uM) showed only partial inhibition (Figure 3G,H, S4A). Taken together, these results indicate  
196 that FGF/MEK/ERK signalling is required in hypoblast specification in human blastoids.

197

### 198 **Signalling environment enhances hypoblast differentiation**

199 Hypoblast-like cells constitute less than 20% of cells after 2D differentiation in PA-N. We investigated  
200 whether this could be increased by adjusting the signalling environment. Release from 24hrs PDA83  
201 treatment into varying concentrations of FGF2 (up to 250 ng/ml) or FGF4 led to only a modest increase

202 in the number of SOX17-tdTomato + cells (Figure S5A,B,C), indicating that autocrine FGF production  
203 is near saturating. Supplementation with Activin or the GSK3 inhibitor, Chiron 99021, two components  
204 purported to promote mouse and human extraembryonic endoderm differentiation<sup>20,33,34</sup>, reduced the  
205 SOX17-tdTomato population (Figure S5D,E).

206

207 The reporter assay and differentiation trajectory analysis showed that epiblast and trophectoderm cells  
208 are major populations in the PA-N differentiation. We reasoned that hypoblast differentiation may be  
209 enhanced by reducing the epiblast and trophectoderm potential. We tested Activin/Nodal inhibition by  
210 A83-01 to destabilise pluripotency<sup>35</sup> and tankyrase inhibition by XAV-939 to limit trophectoderm<sup>15</sup>. The  
211 addition of A83-01 reduced OCT4 positive population by flow cytometry analysis (Figure S5F), and the  
212 addition of XAV-939 reduced the trophectoderm (SOX17/OCT4<sup>-</sup>) population as expected (Figure S5F).  
213 However, treatment with single inhibition did not dramatically increase SOX17+ population. Either  
214 combined with FGF2 (25 ng/ml) synergistically increased the SOX17-tdTomato+ population (Figure  
215 4B). Combining all three inhibitors FGF2+A8301+XAV939 (hereby referred to as FA83X) resulted in the  
216 most significant increase in SOX17-tdTomato+ population (Figure 4B, C). One day of PDA83 treatment  
217 followed by two days of FA83X culture yields ~40% SOX17+ cells (Figure 4B, C). We sorted SOX17+  
218 cells by flow cytometry and examined the gene expression profile of the FA83X differentiation time  
219 course by bulk RNA sequencing analysis (Figure S5G). We saw a sequential upregulation of early and  
220 late hypoblast signature genes after 24 hours and 48 hours in FA83X (Figure S5G).

221

222 We examined hypoblast differentiation in HNES1 GATA3:mKO2 reporter cell lines by staining for  
223 PDGFRA protein. This cell line differentiated very efficiently to trophectoderm and generated less than  
224 1% PDGFRA+ cells in PA-N<sup>14</sup>(Figure 4D). Adding FGF2 marginally increased the PDGFRA+  
225 population, but FA83X yielded ~25% PDGFRA+ cells (Figure 4D, E). Immunofluorescence staining  
226 confirmed the expression of hypoblast markers SOX17 and FOXA2 in the PDGFRA+ population (Figure  
227 4F, S5H). These results confirmed the effect of FA83X in 2D adherent hypoblast differentiation and  
228 supported the hypothesis that FGF-instructed hypoblast differentiation maybe enhanced further by  
229 reducing epiblast and trophectoderm.

230

231 We then tested FA83X on hypoblast differentiation in blastoids made from HNES1:mKO2 reporter cells.  
232 We added FA83X following 48 hours of PDA83 for two days. Blastocyst-like morphology with GATA3+  
233 trophectoderm layer and the blastocoel-like cavities initially formed by 72 hours, however, the cavities  
234 subsequently collapsed between 72 and 96, likely due to inhibition of YAP downstream of XAV939 and  
235 impairment of trophoblast differentiation<sup>15,36</sup>. Nevertheless, we observed a dramatic increase of  
236 FOXA2+ cells at 96 hours. The resultant clusters generally formed an organised bilayer of hypoblast  
237 underlying a large epiblast population (Figure S5 I, J, K).

238

### 239 **PA-FA83X differentiation follows the embryo hypoblast development trajectory**

240 We performed 10x single-cell RNA sequencing on the PA-FA83X time course and produced an  
241 integrated UMAP embedding for PA-N and PA-FA83X differentiation. PA-N and PA-FA83X cells largely

242 intermingled along the time course (Figure 5A). Leiden cluster analysis identified 10 clusters (Figure  
243 5B). Marker expression assigned three main trajectories along the differentiation time course. Naïve  
244 PSCs (cluster 0) either transitioned to formative epiblast (clusters 1, 8, 9, 10) or reached a branching  
245 population (cluster 2) from which they diverged to hypoblast-like (clusters 3, 4) or trophectoderm-like  
246 fate (cluster 6, 7) (Figure 5B). By the end of the differentiation, a distinct cluster (Cluster 5) is present.  
247 This cluster showed enriched expression in genes associated with extraembryonic mesoderm in  
248 marmoset peri-implantation embryos, including genes related to the epithelial-to-mesenchymal  
249 transition (BMP4, LEF1, ZEB2, ETS1, MEIS2, FLI1, and HAND1) and extracellular matrix organisation  
250 (COL4A2, ITGA3, HAPLN1, KDR)<sup>21</sup> (Figure 5C, Figure S6A). We therefore annotated this cluster as  
251 ExEM-like cells.

252  
253 We focused on characterisation of hypoblast formation in PA-FA83X. We first examined global  
254 transcriptome similarity to embryo lineages and projected the PA-FA83X time course on the integrated  
255 embryo UMAP embedding (Figure 5D). Like the PA-N time course, PA-FA83X differentiation begins  
256 with a transition towards a branching point where ICM cells bifurcate to epiblast and hypoblast before  
257 progressing to dpf 6/7 nascent hypoblast. Compared to PA-N, FA83X accelerated hypoblast lineage  
258 maturation. After 48 hours in FA83X, cells are positioned adjacent to hypoblast derivatives while PA-N  
259 cells mostly remain over nascent hypoblast.

260  
261 We collated panels of genes enriched in epiblast and hypoblast lineages and examined their expression  
262 dynamics along hypoblast development in the embryo embedding and in the FA83X differentiation time  
263 course UMAP (cluster 0, 2, 3, 4) (Figure 5E,F). The genes are grouped into 5 classes according to  
264 expression patterns (Figure 5E). Group 1 are pluripotent genes, including NANOG and DPPA5, which  
265 are expressed in ICM and sustained in the epiblast/hypoblast branch and epiblast but switched off in  
266 the nascent hypoblast. Group 2 are ICM markers and mostly sustained in epiblast/hypoblast branch,  
267 but downregulated in the epiblast and nascent hypoblast, such as GSC and LAMA4. Group 3 are  
268 expressed in ICM and throughout hypoblast development (GATA6, PDGFRA). Group 4 and Group 5  
269 are hypoblast-specific markers that appear either in mature blastocyst hypoblast (FOXA2, GATA4) or  
270 late in hypoblast derivatives (APOB, IHH). In vitro hypoblast differentiation exhibited similar gene  
271 expression dynamics to the trajectory in the real embryo from the ICM-like branching population (Figure  
272 5F). In vitro differentiation began with NANOG and DPPA5 expressing epiblast-like cells (cluster 0),  
273 Cells expressed ICM and early hypoblast markers including GATA6, PDGFRA, GSC and LAMA4 within  
274 12 hrs in FA83X after release from PDA83 (mostly cluster 2). Over the following 36 hours in FA83X the  
275 expression of epiblast and ICM markers NANOG, DPPA5, GSC and LAMA4 gradually diminished, and  
276 hypoblast-specific gene expression was up-regulated (cluster 3,4). After 48 hours of differentiation in  
277 FA83X, a group of peri/post-implantation yolk-sac endoderm markers are detected including IHH and  
278 APOB, two markers expressed in primate hypoblast lineages<sup>21</sup> (Figure S2B). By pseudo-temporal  
279 ordering, we delineated the sequential activation of a spectrum of markers along the morula to hypoblast  
280 trajectory in the embryo embedding (Figure S6B). We plotted these markers in our 10x in vitro

281 timecourse and found they broadly mirrored the temporal upregulation of the hypoblast markers in  
282 embryos (Figure S6C).

283

284 Taken together, the global transcriptome and marker expression comparison between embryo and in  
285 vitro differentiation support the conclusion that both PA-N and PA-FA83X differentiation reflect  
286 hypoblast lineage specification dynamics in the blastocyst. In vitro differentiation is initiated with the  
287 onset of co-expression of ICM and early hypoblast markers, partially overlapping with the late ICM and  
288 epiblast/hypoblast branch in the embryo embedding (Figure 2C, 5D). We refer to this as a naïve epiblast  
289 towards ICM-like reversion, a pivotal step in enabling hypoblast lineage specification in vitro.

290

### 291 **Hypoblast lineage specification in the human embryo depends on FGF signalling**

292 These stem-cell based studies indicate that FGF is critical to initiate hypoblast differentiation from an  
293 ICM-like state. We therefore examined whether FGF signalling plays a similar role in the embryo. To  
294 capture the window of emerging hypoblast, we applied PD17 to early day 5 blastocysts, a stage when  
295 most ICM cells are positioned before the epiblast/hypoblast branch point (Figure 2A). We removed the  
296 zona pellucida to ensure free access of the inhibitor to the embryo. The freshly thawed dpf 5 embryos  
297 were cultured either in N2B27 basal medium or with 0.5  $\mu$ M PD17 for 24-40 hours until they developed  
298 fully expanded blastocoel cavities with a recognisable ICM and the appearance of smaller  
299 trophoctoderm cells, traits of late dpf 6/7 blastocysts. The embryos were fixed and immunostained for  
300 NANOG (epiblast), SOX17 and FOXA2 (hypoblast), and GATA3 (trophoctoderm) (Figure 6A). We  
301 examined thirteen PD17-treated embryos and eleven control (N2B27) embryos in three independent  
302 experiments. All control embryos contained SOX17 or FOXA2-positive hypoblast cells within the ICM,  
303 exclusive of NANOG-positive cells. In PD17-treated groups, two embryos did not contain an ICM. Seven  
304 out of the remaining eleven embryos contained NANOG positive epiblast but were devoid of hypoblast  
305 (Figure 6B,C). PD17-treated embryos contained on average a higher number of epiblast cells compared  
306 to the control embryos, which is consistent with a hypoblast to epiblast lineage switch (Figure 6D). This  
307 result mirrors the phenotype of mouse embryos treated with FGFR or MEK inhibitors<sup>28</sup>. The PD17-  
308 treated embryos had an intact blastocyst cavity, indicating no general cellular toxicity. However, four of  
309 the 11 PD17-treated embryos escaped the hypoblast lineage blockage, displaying a similar hypoblast  
310 cell number as the control condition (Figure 6B). The developmental pace of human IVF embryos varies  
311 and staging based on morphology is not precise. We speculate that the embryos that formed hypoblast  
312 in PD17 may have been at a more advanced stage when exposed to PD17.

313

314 Finally, to examine whether FGF can promote hypoblast formation, we cultured dpf 5 embryos until the  
315 late blastocyst stage in medium supplemented with FGF2(250 ng/ml). Quantification of FOXA2 and  
316 NANOG expressing cells within the ICM showed a dramatic increase in hypoblast cell number at the  
317 expense of epiblast in 4 out of 4 FGF-treated embryos (Figure 6E,F, G). These results together reveal  
318 the critical role of FGF in hypoblast lineage specification in early human blastocysts and establish  
319 consistency with findings in the mouse embryo<sup>28</sup>.

320

## 321 **DISCUSSION**

322 Embryogenesis is a process of dynamic cell fate specification and spatial organisation, which must be  
323 well-coordinated to ensure developmental robustness. The limited research access to early embryos  
324 has hampered studies of human embryogenesis. Stem cell-based embryo models are, therefore  
325 promising as a scalable alternative. However, to be a useful model for studying the regulatory  
326 mechanisms of cell fate specification during development a model must faithfully capture the  
327 developmental dynamics and signalling logic in the early embryo. In this study, we establish an *in vitro*  
328 cellular model for human hypoblast lineage segregation. Following a short period of exposure to  
329 MEK/ERK and Activin/Nodal inhibition, human naïve pluripotent stem cells transition to an ICM-like  
330 state whence they give rise to hypoblast and trophectoderm. Single-cell transcriptome analysis  
331 indicates that the *in vitro* ICM-like state to hypoblast differentiation mirrors the ICM to hypoblast  
332 trajectory in the embryo. Authentic nascent hypoblast emerges in *in vitro* cultures that closely  
333 approximates dpf 6/7 hypoblast *in vivo* and further develops features of yolk-sac-like endoderm.

334  
335 A key finding in hypoblast differentiation in both adherent and blastoid cultures is the indispensable role  
336 of FGF signalling. Our experiments have uncovered a transient developmental window during which  
337 FGF signalling plays a critical role in determining the fate of the hypoblast. This 24-hour window in the  
338 differentiation timeline aligns with the early dpf5 embryo before the divergence of hypoblast and epiblast  
339 within ICMs. Our *in vitro* findings align with *in vivo* results, as inhibiting FGF signalling in dpf 5 embryos  
340 led to the suppression of hypoblast formation. Additionally, we demonstrated that the addition of FGF2  
341 to dpf 5 embryos resulted in the conversion of nearly all ICM cells into hypoblast cells, further  
342 substantiating the pivotal role of this signalling pathway in hypoblast specification. It must be noted that  
343 two previous studies with human embryos failed to establish a requirement for FGF signalling in  
344 hypoblast lineage specification<sup>37,38</sup>. However, those experiments used the MEK inhibitor PD0325901 at  
345 concentrations of only 0.5  $\mu\text{M}$ <sup>31</sup> or 1.0  $\mu\text{M}$ <sup>32</sup> while we found a concentration of 2.0  $\mu\text{M}$  is required to  
346 suppress hypoblast specification in blastoids. Thus, by enabling more systematic investigation, the stem  
347 cell models have clarified the signalling mechanism directing hypoblast specification in human embryo.

348

## 349 **LIMITATIONS OF THE STUDY**

350 Currently there is limited transcriptome data available on post-implantation stage human embryo  
351 hypoblast derivatives. Consequently, we cannot accurately distinguish the various derivatives of the  
352 hypoblast generated by *in vitro* differentiation. Moreover, additional single cell transcriptome data for  
353 dpf 5-dpf 6 embryos may provide greater resolution of, and more markers for, the late ICM hypoblast-  
354 epiblast branch point. The limited availability of human embryos and the challenges in precisely  
355 determining their developmental stage constrain the scale and scope of our study. In addition, we no  
356 longer have access to morula stage embryos and therefore cannot repeat inhibitor experiments exactly  
357 as performed in earlier studies. Two factors that may have influenced the outcome of previous studies,  
358 the half-life of inhibitors in culture with embryos and the effect of the zona pellucida on access to the  
359 embryo, have not been quantified.

360



361 **ACKNOWLEDGEMENTS**

362 We thank Austin Smith for critical comments and for editing the manuscript. Somayyeh Sadat  
363 Tahajjodi provided laboratory assistance. We also acknowledge Corin Liddle and Exeter Bioscience  
364 Imaging Centre for confocal imaging. We thank Paul O'Neill and Jemima Onime from Exeter  
365 Sequencing Facility for their dedicated support in data analysis. This research project was funded by  
366 Biotechnology and Biological Sciences Research Council (BBSRC) with a research grant  
367 (BB/V017128/1). This project utilised equipment funded by the Wellcome Trust Institutional Strategic  
368 Support Fund (WT097835MF), Wellcome Trust Multi-User Equipment Awards (WT101650MA,  
369 218247/Z/19/Z) and BBSRC LOLA award (BB/K003240/1) and Medical Research Council (MRC)  
370 Clinical Infrastructure Funding (MR/M008924/1). PWZ is the Canada Research Chair in Stem Cell  
371 Bioengineering. PWZ receives funding from NSERC Discovery Grant (RGPIN-2020-06496) and CIHR  
372 Foundation Grant (FDN 154283). SL is supported by a Wellcome GW4-CAT fellowship.  
373 (222850/Z/21/Z).

374

375 **AUTHOR CONTRIBUTIONS**

376 Conceptualisation, GG, AD; Investigation, AD, ECS, YT; Analysis, AD, AR, TH; Methodology, FC, SL;  
377 Writing, GG, AD; Supervision GG, JN, PZ, JM

378

379 **DECLARATION OF INTERESTS**

380 GG is an inventor on a patent relating to human naïve pluripotent stem cells filed by the University of  
381 Cambridge. SL reports non-financial support from Pfizer outside the submitted work.

382

383 **MATERIALS AND METHODS**

384 Thawing and culture of human embryos

385 Use of supernumerary embryos is approved by the Multi-Centre Research Ethics Committee, approval  
386 04/MRE03/44, Integrated Research Application System (IRAS) 21/PR/1231 and licensed by the Human  
387 Embryology and Fertilization Authority of the United Kingdom under the research license R0178.

388 Surplus frozen human embryos were donated for research after informed consent by couples following  
389 in vitro fertilization treatment. Early D5 blastocysts were thawed following specific IVF clinic instructions  
390 and cultured in equilibrated N2B27 medium under mineral oil in a humidified incubator at 37 degrees,  
391 7% CO<sub>2</sub> and 5% O<sub>2</sub> for 1-2h before assessing viability and suitability for subsequent treatment.

392

393 Human embryo treatment

394 The zona pellucida was removed from early D5 blastocysts (unless otherwise stated) using acid Tyrode  
395 solution (Gibco) prior to start of the treatment. Human early Day 5 embryos were treated with either:  
396 0.5µM PD17, 250ng/ml FGF2 (all in N2B27) or maintained in N2B27 (+DMSO) as control. Blastocysts  
397 were cultured in NUNC IVF dishes (#150260, Thermo Fisher) in a humidified incubator at 37 degrees,  
398 7% CO<sub>2</sub> and 5% O<sub>2</sub> for the duration of the treatment.

399

#### 400 Immunostaining of human embryos

401 The treatment was maintained until the embryos reached the late D6/D7 stage (30-48h), assessed by  
402 blastocoele size<sup>5</sup>, when embryos were fixed in 4% paraformaldehyde in PBS at room temperature for  
403 15 min. Blastocysts were then rinsed in 3mg/ml polyvinylpyrrolidone (Sigma-Aldrich) (PBS/PVP) prior  
404 to permeabilization in 0.25% Triton X-100 (Sigma-Aldrich) for 30 min and blocking in 0.1% bovine serum  
405 albumin, 0.01% Tween 20 (Sigma-Aldrich) and 2% donkey serum for 2-3 hours at room temperature.  
406 Primary and secondary antibodies were diluted in blocking buffer. Primary antibody incubation was  
407 performed overnight at 4 degrees, followed by three rinses of 15 min in blocking buffer. Secondary  
408 antibody incubation was performed at room temperature, in the dark, for 1-2h followed by three  
409 additional rinses in blocking buffer for 15 min. Blastocyst were imaged through a poly-D-lysine-coated  
410 Mattek dish (P356-0-14) in blocking buffer.

411

#### 412 Imaging and analysis of immunostained human embryos

413 Stained human embryos were imaged with Leica Stellaris 8 confocal microscope, objective: HC PL  
414 APO CS2 40x/1.10 water. Confocal images were analysed using FIJI. The number of epiblast or  
415 hypoblast cells were counted using the "Cell Counter" plugin in FIJI.

416

#### 417 Human naïve PSC culture

418 Embryo-derived human naïve pluripotent cells (HNES1) or reprogrammed naïve pluripotent cells  
419 (nIPSCs) were propagated in PXGL medium as described in<sup>10</sup>. PXGL comprises 1  $\mu$ M PD0325901 (P),  
420 2  $\mu$ M XAV939 (X), 2  $\mu$ M Gö6983 (G) and 10 ng/mL human LIF (L) in N2B27 medium. Cells were  
421 cultured on mitomycin-inactivated MEF feeders. Rho associated kinase inhibitor (10 $\mu$ M, Y-27632) and  
422 Geltrex (0.5  $\mu$ l/cm<sup>2</sup> well surface area, Thermo Fisher Scientific, A1413302) were added to media during  
423 replating. Cells were passaged by dissociation with Accutase (Biological, 423201) every 3-4 days.

424

#### 425 Differentiation

426 Human naïve cells were plated in PXGL with Y-27632 (10 $\mu$ M) on Geltrex coated 6 well plates. The next  
427 day, cultures were washed with PBS and medium was exchanged to N2B27 containing chemical  
428 inhibitors and cytokines. Medium was refreshed or exchanged every day until the end of the assay.  
429 Concentrations of small molecules/cytokines were optimised for the cell line being assayed. For PDA83  
430 treatment, PD03: 1 or 2  $\mu$ M; A83-01: 1 or 2  $\mu$ M. For FA83X hypoblast induction: FGF2: 25 ng/ml; A83-  
431 01: 1  $\mu$ M; XAV: 2  $\mu$ M.

432

#### 433 CRISPR-mediated generation of OCT4-GFP/SOX17-tdTomato nIPSCs

434 nIPSCs reprogrammed from human dermal fibroblasts (HDF16) were transfected with 3  $\mu$ g targeting  
435 vector pUC19-OCT4-T2A-NLS-EmGFP-P2A-Puro (kind gift from Timo Otonkoski; Addgene plasmid  
436 #89992) and 3  $\mu$ g of PX459 plasmid (kind gift from Feng Zhang; Addgene plasmid ##62988) expressing  
437 both cas9 and a cloned gRNA (5'-TCTCCCATGCATTCAAAGT-3') to target near to the stop codon of  
438 OCT4. Correctly targeted colonies were selected by Puromycin selection for 3 days and checked for  
439 GFP expression. OCT4-T2A-GFP nIPSCs were then expanded and transfected with 3  $\mu$ g SOX17-H2B-

440 tdTomato-PGK-Neo targeting vector (kind gift from Ali H. Brivanlou) and 3  $\mu$ g of PX459 plasmid  
441 expressing cas9 and a cloned gRNA (5'- CAACTATCCTGACGTGTGAC-3') to target the stop codon  
442 near SOX17. Continuous selection with G418 for two passages purified potentially targeted cells. At  
443 least 40 colonies were picked, expanded, and screened for SOX17-tdTomato expression using 1 day  
444 pulse of PDA83 followed by release into N2B27. Correctly targeted OCT4-GFP/SOX17-tdTomato  
445 colonies were validated by differentiation in trophectoderm-inductive conditions to assay for  
446 disappearance of OCT4-GFP signal, and co-staining of SOX17-tdTomato with SOX17 antibody in  
447 hypoblast inductive conditions.

448

#### 449 Generation of blastoids

450 PXGL cultures of naive stem cells in exponential growth were dissociated with TrypLE for 5 min and  
451 spun in wash buffer (DMEM/F12 supplemented with 0.1% BSA). The cell pellet was resuspended in  
452 PD+A83+Y medium. For HNES1 GATA3:mKO2 cell lines we used 2  $\mu$ M PD0325901, 2  $\mu$ M A83-01 and  
453 10  $\mu$ M Y-27632 resuspended in N2B27 media. For niPSC cell lines we added 0.5  $\mu$ M LPA to PD+A83+Y  
454 to increase cavitation efficiency. Cell numbers were counted using a haemocytometer. We added ~20K  
455 cells to 10 ml of PD+A83+Y media. 50  $\mu$ l of the cell suspension was dispensed to each well of an ultra-  
456 low attachment multiple-well plate (Cell Carrier Spheroid ULA 96-well Microplates, 6055330) with a  
457 multichannel pipette thereby aiming for ~100cells/well. Plates were centrifuged at 1400 RPM for 5 min  
458 at room temperature to cluster cells at the bottom of the wells. After 48 h, the media in the well was  
459 changed to pre-warmed N2B27 supplemented with 0.5  $\mu$ M A83-01 by careful aspiration using a multi-  
460 channel pipette. At the end of day 3, media was changed to N2B27 medium devoid of all inhibitors.  
461 Blastoids fixed at 96 hrs with 4% formaldehyde and transferred to PBS for storage at 4c.

462

#### 463 Immunostaining of blastoids

464 Fixed blastoids stored in PBS were permeabilized with 0.3% Triton X-100 in PBS (0.3% PBSTx) for  
465 15 min. Blocking was performed in blocking buffer (1%BSA in 0.1% PBSTx) at room temperature for 1  
466 hr. Primary antibodies were diluted in blocking buffer and incubated with blastoids for at least 16 hours  
467 overnight at 4c. Blastoids were washed with blocking buffer 4 times, before incubation of fluorophore-  
468 conjugated secondary antibody (1:1000 diluted in blocking buffer) for 1 hour at room temperature.  
469 Blastoids were washed three times with blocking buffer and followed by one wash in in PBS before  
470 addition of DAPI (500 ng/mL) in PBS and incubated for 15 mins. Stained blastoids were rinsed with  
471 PBS and were stored for imaging.

472

#### 473 Imaging of blastoids

474 Stained blastoids were imaged with Airyscan LSM880 with a D LCI Plan-Apochromat 25x/0.8 Imm Corr  
475 DIC M27 objective with oil immersion. Images were acquired with Airyscan FAST Mode for ICM cell  
476 quantification or with R-S mode of representative high-resolution images. Confocal images were  
477 analysed in IMARIS, and cells classified using the automated spot detection module, manually checked,  
478 and quantified.

479

## 480 Transcriptome Sequencing

481 For 10x Genomics Chromium Single Cell sequencing, samples were multiplexed using 3' CellPlex Kit  
482 Set A. Single cell capture and library preparation was performed on a Chromium Controller using the  
483 Chromium GEM Single Cell 3' Kit version 3.1 as per the user guide, targeting a recovery of 3,000 cells  
484 per sample. We targeted a gene expression (GEX) coverage of 40,000-50,000 reads per cell, and  
485 10,000-12,000 reads per cell multiplex oligo. Sequencing was performed on a Novaseq 6000  
486 instrument generating paired end reads (28x10x10x90 bases). Sample demultiplexing, alignment, and  
487 quantification of barcode counts was performed using CellRanger Multi.

488  
489 Scanpy was used to read and analyse raw read counts from the CellRanger output. Cells expressing  
490 fewer than 15,000 counts, more than 100,000 counts, or more than 15% mitochondrial reads were  
491 filtered out. The resultant count matrix was normalised and log-transformed using `recipe_zheng_17`.  
492 The top 1000 highly variable genes were identified for initial dimensionality reduction with PCA prior to  
493 non-linear dimensionality reduction using UMAP. Cells visualised in UMAP plots were coloured  
494 according to individual marker gene expression values, and the Leiden algorithm (resolution 0.8) was  
495 used to identify cell clusters.

496

## 497 Comparison of in vitro cultures against human embryo reference

498 To relate samples from our in vitro sequencing data to the Radley et al. 2023 human embryo  
499 embedding<sup>4</sup>, we took the UMAP model object from their paper and used the `umap.transform` function  
500 to position each individual sample from our data into the UMAP latent space. In doing so, we can identify  
501 which samples in the early human embryo our in vitro samples are most transcriptionally similar to,  
502 according to an unbiased set of 3012 genes.

503

## 504 Hypoblast gene activation pseudotime ordering

505 We took the UMAP embedding defined by Radley et al. (2023)<sup>4</sup> and focussed on the cells stages  
506 comprising morula, ICM, Epi/Hyp branch point, epiblast and hypoblast. Pseudotime along the hypoblast  
507 branch was calculated using the Slingshot R package<sup>39</sup>. Gene expression values were smoothed by  
508 taking the average gene expression for each cell and its 30 most similar cells according to the 3012  
509 highly structured genes identified by Radley et al. (2023)<sup>4</sup>. Logistic regression curves were fit to the  
510 smoothed expression profiles versus the hypoblast pseudotime. The hypoblast pseudotime value that  
511 corresponds to the half-way point on the y-axis of the logistic curve indicates the tipping point between  
512 a gene being active versus inactive.

513

## 514 REFERENCES

- 515 1. Rossant, J. (1975). Investigation of the determinative state of the mouse inner cell  
516 mass. I. Aggregation of isolated inner cell masses with morulae. J Embryol Exp Morphol.  
517 2. Rossant, J. (1975). Investigation of the determinative state of the mouse inner cell  
518 mass. II. The fate of isolated inner cell masses transferred to the oviduct. J Embryol Exp  
519 Morphol.

- 520 3. Gardner, R.L. (1983). Origin and differentiation of extraembryonic tissues in the mouse.  
521 *Int Rev Exp Pathol*.
- 522 4. Radley, A., and Smith, A. (2023). Branching topology of the human embryo  
523 transcriptome revealed by entropy sort feature weighting. *bioRxiv*,  
524 2023.10.12.562031. 10.1101/2023.10.12.562031.
- 525 5. Corujo-Simon, E., Radley, A.H., and Nichols, J. (2023). Evidence implicating sequential  
526 commitment of the founder lineages in the human blastocyst by order of hypoblast  
527 gene activation. *Development* 150. 10.1242/DEV.201522.
- 528 6. Radley, A., Corujo-Simon, E., Nichols, J., Smith, A., and Dunn, S.J. (2023). Entropy sorting  
529 of single-cell RNA sequencing data reveals the inner cell mass in the human pre-  
530 implantation embryo. *Stem Cell Reports* 18, 47. 10.1016/J.STEMCR.2022.09.007.
- 531 7. Stirparo, G.G., Boroviak, T., Guo, G., Nichols, J., Smith, A., and Bertone, P. (2018).  
532 Integrated analysis of single-cell embryo data yields a unified transcriptome signature  
533 for the human preimplantation epiblast. *Development*. 10.1242/dev.158501.
- 534 8. Boroviak, T., Stirparo, G.G., Dietmann, S., Hernando-Herraez, I., Mohammed, H., Reik,  
535 W., Smith, A., Sasaki, E., Nichols, J., and Bertone, P. (2018). Single cell transcriptome  
536 analysis of human, marmoset and mouse embryos reveals common and divergent  
537 features of preimplantation development. *Development* 145, dev167833.  
538 10.1242/dev.167833.
- 539 9. Gerri, C., McCarthy, A., Alanis-Lobato, G., Demtschenko, A., Bruneau, A., Loubersac, S.,  
540 Fogarty, N.M.E., Hampshire, D., Elder, K., Snell, P., et al. (2020). Initiation of a conserved  
541 trophoctoderm program in human, cow and mouse embryos. *Nature* 587, 443–447.  
542 10.1038/S41586-020-2759-X.
- 543 10. Bredenkamp, N., Yang, J., Clarke, J., Stirparo, G.G., von Meyenn, F., Dietmann, S., Baker,  
544 D., Drummond, R., Ren, Y., Li, D., et al. (2019). Wnt Inhibition Facilitates RNA-Mediated  
545 Reprogramming of Human Somatic Cells to Naive Pluripotency. *Stem Cell Reports* 13,  
546 1083–1098. 10.1016/j.stemcr.2019.10.009.
- 547 11. Takashima, Y., Guo, G., Loos, R., Nichols, J., Ficz, G., Krueger, F., Oxley, D., Santos, F.,  
548 Clarke, J., Mansfield, W., et al. (2014). Resetting Transcription Factor Control Circuitry  
549 toward Ground-State Pluripotency in Human. *Cell* 158, 1254–1269.  
550 10.1016/j.cell.2014.08.029.
- 551 12. Theunissen, T.W., Powell, B.E., Wang, H., Mitalipova, M., Faddah, D.A., Reddy, J., Fan,  
552 Z.P., Maetzel, D., Ganz, K., Shi, L., et al. (2014). Systematic identification of culture  
553 conditions for induction and maintenance of naive human pluripotency. *Cell Stem Cell*.  
554 10.1016/j.stem.2014.07.002.
- 555 13. Guo, G., Von Meyenn, F., Santos, F., Chen, Y., Reik, W., Bertone, P., Smith, A., and  
556 Nichols, J. (2016). Naive Pluripotent Stem Cells Derived Directly from Isolated Cells of  
557 the Human Inner Cell Mass. *Stem Cell Reports* 6, 437. 10.1016/J.STEMCR.2016.02.005.
- 558 14. Guo, G., Stirparo, G.G., Strawbridge, S.E., Spindlow, D., Yang, J., Clarke, J., Dattani, A.,  
559 Yanagida, A., Li, M.A., Myers, S., et al. (2021). Human naive epiblast cells possess  
560 unrestricted lineage potential. *Cell Stem Cell* 28, 1040-1056.e6.  
561 10.1016/j.stem.2021.02.025.
- 562 15. Dattani, A., Huang, T., Liddle, C., Smith, A., and Guo, G. (2022). Suppression of YAP  
563 safeguards human naïve pluripotency. *Development (Cambridge)* 149.  
564 10.1242/DEV.200988/283159/AM/SUPPRESSION-OF-YAP-SAFEGUARDS-HUMAN-  
565 NAIVE.



- 566 16. Kagawa, H., Javali, A., Khoei, H.H., Sommer, T.M., Sestini, G., Novatchkova, M., Scholte  
567 op Reimer, Y., Castel, G., Bruneau, A., Maenhoudt, N., et al. (2022). Human blastoids  
568 model blastocyst development and implantation. *Nature* *601*, 600–605.  
569 10.1038/s41586-021-04267-8.
- 570 17. Yanagida, A., Spindlow, D., Nichols, J., Dattani, A., Smith, A., and Guo, G. (2021). Naive  
571 stem cell blastocyst model captures human embryo lineage segregation. *Cell Stem Cell*  
572 *28*, 1016-1022.e4. 10.1016/j.stem.2021.04.031.
- 573 18. Zhao, C., Reyes, A.P., Schell, J.P., Weltner, J., Ortega, N.M., Zheng, Y., Björklund, Å.K.,  
574 Rossant, J., Fu, J., Petropoulos, S., et al. (2021). Reprogrammed blastoids contain  
575 amnion-like cells but not trophectoderm. *bioRxiv*, 2021.05.07.442980.  
576 10.1101/2021.05.07.442980.
- 577 19. Ito, S., Kabata, M., Iemura, Y., Semi, K., Morone, N., Minagawa, A., Wang, B., Okamoto,  
578 I., Nakamura, T., Kojima, Y., et al. (2021). Capturing human trophoblast development  
579 with naive pluripotent stem cells in vitro. *Cell Stem Cell* *28*, 1023-1039.e13.  
580 10.1016/j.stem.2021.03.013.
- 581 20. Mackinlay, K.M.L., Weatherbee, B.A.T., Rosa, V.S., Handford, C.E., Hudson, G., Coorens,  
582 T., Pereira, L. V., Behjati, S., Vallier, L., Shahbazi, M.N., et al. (2021). An in vitro stem  
583 cell model of human epiblast and yolk sac interaction. *Elife* *10*. 10.7554/eLife.63930.
- 584 21. Bergmann, S., Penfold, C.A., Slatery, E., Siriwardena, D., Drummer, C., Clark, S.,  
585 Strawbridge, S.E., Kishimoto, K., Vickers, A., Tewary, M., et al. (2022). Spatial profiling  
586 of early primate gastrulation in utero. *Nature* *609*, 136–143. 10.1038/S41586-022-  
587 04953-1.
- 588 22. Tyser, R.C.V., Mahammadov, E., Nakanoh, S., Vallier, L., Scialdone, A., and Srinivas, S.  
589 (2021). Single-cell transcriptomic characterization of a gastrulating human embryo.  
590 *Nature* *2021 600:7888 600*, 285–289. 10.1038/s41586-021-04158-y.
- 591 23. Plusa, B., Piliszek, A., Frankenberg, S., Artus, J., and Hadjantonakis, A.K. (2008). Distinct  
592 sequential cell behaviours direct primitive endoderm formation in the mouse  
593 blastocyst. *Development* *135*, 3081–3091. 10.1242/DEV.021519.
- 594 24. Chowdhary, S., and Hadjantonakis, A.K. (2022). Journey of the mouse primitive  
595 endoderm: from specification to maturation. *Philos Trans R Soc Lond B Biol Sci* *377*.  
596 10.1098/RSTB.2021.0252.
- 597 25. Molotkov, A., Mazot, P., Brewer, J.R., Cinalli, R.M., and Soriano, P. (2017). Distinct  
598 Requirements for Fgfr1 and Fgfr2 in Primitive Endoderm Development and Exit from  
599 Pluripotency. *Dev Cell* *41*, 511. 10.1016/J.DEVCEL.2017.05.004.
- 600 26. Kang, M., Garg, V., and Hadjantonakis, A.K. (2017). Lineage Establishment and  
601 Progression within the Inner Cell Mass of the Mouse Blastocyst Requires FGFR1 and  
602 FGFR2. *Dev Cell* *41*, 496-510.e5. 10.1016/J.DEVCEL.2017.05.003.
- 603 27. Lanner, F., and Rossant, J. (2010). The role of FGF/Erk signaling in pluripotent cells.  
604 *Development* *137*, 3351–3360. 10.1242/DEV.050146.
- 605 28. Yamanaka, Y., Lanner, F., and Rossant, J. (2010). FGF signal-dependent segregation of  
606 primitive endoderm and epiblast in the mouse blastocyst. *Development* *137*, 715–724.  
607 10.1242/DEV.043471.
- 608 29. Kang, M., Piliszek, A., Artus, J., and Hadjantonakis, A.K. (2013). FGF4 is required for  
609 lineage restriction and salt-and-pepper distribution of primitive endoderm factors but  
610 not their initial expression in the mouse. *Development* *140*, 267–279.  
611 10.1242/DEV.084996.

- 612 30. Rappolee, D.A., Basilico, C., Patel, Y., and Werb, Z. (1994). Expression and function of  
613 FGF-4 in peri-implantation development in mouse embryos. *Development* *120*, 2259–  
614 2269. [10.1242/DEV.120.8.2259](https://doi.org/10.1242/DEV.120.8.2259).
- 615 31. Guo, G., Huss, M., Qing Tong, G., Wang, C., Li Sun, L., Clarke, N.D., and Robson, P.  
616 Developmental Cell Resource Resolution of Cell Fate Decisions Revealed by Single-Cell  
617 Gene Expression Analysis from Zygote to Blastocyst. *Dev Cell* *18*, 675–685.  
618 [10.1016/j.devcel.2010.02.012](https://doi.org/10.1016/j.devcel.2010.02.012).
- 619 32. Nichols, J., Silva, J., Roode, M., and Smith, A. (2009). Suppression of Erk signalling  
620 promotes ground state pluripotency in the mouse embryo. *Development* *136*, 3215–  
621 3222. [10.1242/DEV.038893](https://doi.org/10.1242/DEV.038893).
- 622 33. Linneberg-Agerholm, M., Wong, Y.F., Herrera, J.A.R., Monteiro, R.S., Anderson, K.G.V.,  
623 and Brickman, J.M. (2019). Naïve human pluripotent stem cells respond to Wnt, Nodal  
624 and LIF signalling to produce expandable naïve extra-embryonic endoderm.  
625 *Development* *146*. [10.1242/DEV.180620](https://doi.org/10.1242/DEV.180620).
- 626 34. Anderson, K.G.V., Hamilton, W.B., Roske, F. V., Azad, A., Knudsen, T.E., Canham, M.A.,  
627 Forrester, L.M., and Brickman, J.M. (2017). Insulin fine-tunes self-renewal pathways  
628 governing naive pluripotency and extra-embryonic endoderm. *Nature Cell Biology*  
629 *2017* *19*:10 *19*, 1164–1177. [10.1038/ncb3617](https://doi.org/10.1038/ncb3617).
- 630 35. Vallier, L., Mendjan, S., Brown, S., Ching, Z., Teo, A., Smithers, L.E., Trotter, M.W.B.,  
631 Cho, C.H.H., Martinez, A., Rugg-Gunn, P., et al. (2009). Activin/Nodal signalling  
632 maintains pluripotency by controlling Nanog expression. *Development* *136*, 1339–  
633 1349. [10.1242/DEV.033951](https://doi.org/10.1242/DEV.033951).
- 634 36. Wang, W., Li, N., Li, X., Tran, M.K., Han, X., and Chen, J. (2015). Tankyrase Inhibitors  
635 Target YAP by Stabilizing Angiomotin Family Proteins. *Cell Rep* *13*, 524–532.  
636 [10.1016/j.celrep.2015.09.014](https://doi.org/10.1016/j.celrep.2015.09.014).
- 637 37. Kuijk, E.W., van Tol, L.T.A., van de Velde, H., Wubbolts, R., Welling, M., Geijsen, N., and  
638 Roelen, B.A.J. (2012). The roles of FGF and MAP kinase signaling in the segregation of  
639 the epiblast and hypoblast cell lineages in bovine and human embryos. *Development*  
640 *139*, 871–882. [10.1242/DEV.071688](https://doi.org/10.1242/DEV.071688).
- 641 38. Roode, M., Blair, K., Snell, P., Elder, K., Marchant, S., Smith, A., and Nichols, J. (2012).  
642 Human hypoblast formation is not dependent on FGF signalling. *Dev Biol* *361*, 358–363.  
643 [10.1016/J.YDBIO.2011.10.030](https://doi.org/10.1016/J.YDBIO.2011.10.030).
- 644 39. Street, K., Risso, D., Fletcher, R.B., Das, D., Ngai, J., Yosef, N., Purdom, E., and Dudoit,  
645 S. (2018). Slingshot: Cell lineage and pseudotime inference for single-cell  
646 transcriptomics. *BMC Genomics* *19*, 1–16. [10.1186/S12864-018-4772-0/FIGURES/5](https://doi.org/10.1186/S12864-018-4772-0/FIGURES/5).

## 647 648 649 **LEGENDS**

### 650 Figure 1: Hypoblast differentiation in human naïve iPSC-OS1 cells

- 651 (A) Schematic of nPSC differentiation in condition PA or PA-N.
- 652 (B) Live image of niPSC-OS1 culture differentiated in PA-N for 3 days. Scale Bar = 50 µM.
- 653 (C) Flow cytometry analysis of OCT4-eGFP and SOX17-td tomato expression after three days  
654 culture in differentiation conditions PA or PA-N.
- 655 (D) Flow cytometry analysis of OCT4-eGFP and SOX17-td tomato expression after three days  
656 culture in N2B27 without prior PD03+A83 treatment.

- 657 (E) Combined UMAP of the 10x single-cell sequencing of PA and PA-N differentiation time course,  
658 coloured according to condition and time.  
659 (F) Log2 expression of selected markers genes indicating differentiation trajectories in (D).  
660

661 **Figure 2: Comparative analysis of hypoblast differentiation with embryo lineage segregation trajectories**

- 662 (A) UMAP embedding of integrated embryo single-cell datasets generated using entropy sorting-  
663 selected gene features as in Radley and Smith (2023). UMAP shows cells by embryo stage.  
664 (B) Log2 expression of pluripotency, hypoblast, and hypoblast derivative markers in (A), indicating  
665 lineage trajectories.  
666 (C) Projection of 10x scRNA-seq PA-N timecourse on embryo embedding using the same entropy  
667 sorting selected gene features as in (A).  
668 (D) Immunostaining for indicated markers on HNES1 GATA3:mKO2 cells cultured in PXGL on  
669 mouse embryonic feeders (MEFs), Scale Bar = 100  $\mu$ M.  
670 (E) Immunostaining for indicated markers on HNES1 GATA3:mKO2 cells following one day of  
671 treatment with PD03+A83 and release into N2B27 for 16 hrs. Scale Bar = 50  $\mu$ M. Zoomed-in  
672 inset scale bar = 5  $\mu$ M  
673

674 **Figure 3: In vitro hypoblast differentiation requires FGF**

- 675 (A) A schematic illustration of PA-N differentiation conditions with PD17 (0.5  $\mu$ M) added at two  
676 subsequent time points following PDA83 (PA) treatment.  
677 (B) Flow cytometry analysis of OCT4-eGFP and SOX17-tdTomato expression following PA-N, PA-  
678 PD17, and PA-N-PD17 treatment.  
679 (C) Plot shows the SOX17-tdTomato-positive population quantified by flow cytometry analysis as  
680 in (B). Mean + S.D. from N=3 experiments.  
681 (D) A schematic illustration of blastoid formation protocol using PXGL naïve PSCs.  
682 (E) Immunostaining for indicated markers during blastoid formation using HNES1 GATA3:mKO2  
683 cells. Scale Bar = 20  $\mu$ M  
684 (F) Quantification of hypoblast (FOXA2+) versus ICM/Epiblast (OCT4+) cells at indicated time  
685 points during blastoid formation. Mean ratio + S.D. from N=3 experiments.  
686 (G) Live imaging of blastoids formed using niPSC-OS1 reporter cells, indicating three categories of  
687 the brightness of SOX17-tdTomato reporter.  
688 (H) Assay of SOX17-tdTomato expression in niPSC-OS1 blastoids formed with or without FGF  
689 signalling inhibitors. Inhibitors were added immediately following PDA83 treatment except for  
690 the PD17-delayed samples, where the PD17 was added 24 hours after release from PDA83.  
691 Bar chart shows the percentage of niPSC-OS1 blastoids according to the brightness of SOX17-  
692 tdTomato reporter expression as in (G).  
693 (I) Assay of hypoblast cells in HNES1 GATA3:mKO2 blastoids at 96 hrs with or without PD17.  
694 Images are immunostaining for indicated markers. Scale Bar = 20  $\mu$ M.

695 (J) Quantification of hypoblast (FOXA2+) versus ICM/Epiblast (OCT4+) cells in HNES1  
696 GATA3:mKO2 blastoids at 96hr. PD17 was added either early or 24 hours delayed, as in (G).  
697 Mean ratio + S.D. from N=3 experiments.

698

699 Figure 4: Signalling influence on hypoblast differentiation

700 (A) Schematic of differentiation conditions for testing of small molecule inhibitors or cytokines that  
701 improve hypoblast efficiency compared to PA-N.

702 (B) The percentage of SOX17-tdTomato positive population by flow cytometry analysis in niPSC-  
703 OS1 culture after differentiation with indicated testing factors added singly or combined. Mean  
704 + S.D. from N=3 experiments.

705 (C) Flow cytometry analysis shows subpopulations of OCT4-eGFP+, SOX17-tdTomato+, and  
706 double-negative populations following three days of differentiation in PA-N or PA-FA83X.

707 (D) Flow cytometry analysis of PDGFRA and GATA3:mKO2 expression in HNES1GATA3:mKO2  
708 culture following three days of differentiation in indicated conditions.

709 (E) Percentage of PDGFRA-APC-positive population by flow cytometry as in (D). Mean + S.D. from  
710 N=3 experiments.

711 (F) Immunostaining for indicated markers for HNES1 GATA3:mKO2 following differentiation in PA-  
712 FA83X (3 days). Scale Bar = 100  $\mu$ M.

713

714 Figure 5: Single-cell sequencing analysis of the PA-FA83X differentiation

715 (A) UMAP of PA-N and PA-FA83X timecourses.

716 (B) Combined PA-N and PA-FA83X UMAPs, coloured according to identified Leiden clusters.

717 (C) Log<sub>2</sub> expression of selected extra-embryonic mesoderm markers in (A). Markers are  
718 upregulated in extra-embryonic mesoderm in marmoset early embryo single-cell dataset  
719 (Bergmann 2022<sup>21</sup>).

720 (D) Projection of 10x scRNA-seq PA-FA83X timecourse on embryo embedding.

721 (E) Smoothed expression of indicated genes in embryo UMAP embedding subsetted to morula  
722 (D4), ICM (D5), naïve epiblast (D6+D7), and hypoblast cells (D6-D14).

723 (F) Expression of indicated genes in combined PA-N and PA-FA83X UMAP subsetted to naïve  
724 epiblast, transitional ICM, early hypoblast, and late hypoblast.

725

726 Figure 6: FGF signalling drives human hypoblast in blastocyst

727 (A) Immunostaining for indicated markers in fully expanded blastocyst following 24 – 44 hours  
728 culture either in N2B27 (control) or N2B27 containing PD17 (0.5  $\mu$ M) after thawing of vitrified  
729 human embryos at dpf 5. Scale Bar = 50  $\mu$ M

730 (B) Quantification of epiblast (SOX2+ or NANOG+) and hypoblast (SOX17+ or FOXA2+) cell  
731 numbers in control and PD17-treated embryos in three experiment. X-axis indicates each  
732 embryo assayed.

733 (C) Hypoblast to total ICM (epiblast & hypoblast) ratio for control and PD17 treated embryos.

734 (D) Comparison of epiblast cell numbers of control and PD17 treated embryos.

735 (E) Immunostaining for indicated markers in fully expanded blastocyst after 24 – 44 hours culture  
736 in N2B27 or FGF2 (250ng/mL) following thawing of vitrified D5 human embryos. Scale Bar =  
737 50  $\mu$ M

738 (F) Quantification of epiblast and hypoblast numbers in control and FGF2 treated embryos.

739 (G) Hypoblast to total ICM (epiblast & hypoblast) ratio for control and FGF2 treated embryos.

740

741 Supplemental Figure 1: Hypoblast differentiation of niPSCs OCT4-eGFP/SOX17-tdTomato reporter  
742 cells (niPSC-OS1)

743 (A) Schematic of donor construct for tagging OCT4 and SOX17.

744 (B) Images show co-localise of immunofluorescence against SOX17 protein with SOX17-tdTomato  
745 reporter expression in differentiated niPSC-OS1 reporter cells. Scale Bar = 50  $\mu$ M.

746 (C) Live image of niPSC-OS1 culture in PXGL on MEFs. Scale Bar = 100  $\mu$ M.

747 (D) Flow cytometry analysis of OCT4-eGFP and SOX17-tdTomato expression in niPSC-OS1  
748 culture over three days in PDA83.

749 (E) Image of niPSC-OS1 cells after three days in PDA83 and immunostained for GATA3. Scale  
750 Bar = 100  $\mu$ M.

751 (F) Flow cytometry analysis of OCT4-eGFP and SOX17-tdTomato expression in niPSC-OS1  
752 culture over three days in PA-N.

753 (G) Image of niPSC-OS1 cells after three days in PD-N and immunostained for GATA3. Scale Bar  
754 = 100  $\mu$ M.

755 (H) Log<sub>2</sub> expression of indicated pluripotency markers in combined UMAP of the PA and PA-N  
756 timecourse.

757

758 Supplemental Figure 2: Lineage marker expression in human embryos and in nPSC differentiation

759 (A) Violin plots show log<sub>2</sub> expression of markers expressed in both hypoblast/yolk sac and  
760 definitive endoderm (DE).

761 (B) Violin plots show markers highly expressed in the hypoblast and derived yolk sac, but lowly  
762 expressed in definitive endoderm in human CS7 embryos as in Tyser et al. (2022).

763 (C) Log<sub>2</sub> expression of hypoblast-specific markers in 10x combined UMAP of PDA83 and PA-N  
764 timecourses.

765

766 Supplemental Figure 3: Lineage markers expression in blastoid

767 (A) Log<sub>2</sub> expression of FGF receptors and ligands in the combined UMAP of the PA and PA-N  
768 timecourses (top panel) and embryo embedding (bottom panel).

769 (B) Immunostaining for indicated markers during blastoid differentiation using HNES1 GATA3:mkO2  
770 cells. White arrows indicate NANOG/GATA6 double positive cells. Yellow arrows indicate  
771 GATA6 positive /NANOG negative cells. Scale Bar = 20  $\mu$ M.

772

773 Supplemental Figure 4: FGF inhibitor assay on niPSC-OS1 blastoid



- 774 (A) Live Images of Day 4 blastoids formed with niPSC OS1 cells in the indicated conditions with or  
775 without PD17 treatment. Scale Bar = 100  $\mu$ M. Pictures are overlaid live images of phase and  
776 fluorescence of GFP and tdTomato.
- 777 (B) Live Images of Day4 blastoids formed with niPSC OS1 cells in the indicated conditions with or  
778 without PD03 treatment. Scale Bar = 100  $\mu$ M. Pictures are overlaid live images of phase and  
779 fluorescence of GFP and tdTomato.

780

781 Supplemental Figure 5: Signalling environment influence lineage choice in naïve PSC differentiation

- 782 (A) Flow cytometry analysis of OCT4-eGFP and SOX17-tdTomato expression following PA-N, PA-  
783 FGF2, and PA-FGF4 treatments.
- 784 (B) SOX17-tdTomato positive population by flow analysis following PA-N, PA-FGF2 and PA-FGF4  
785 treatments. Mean from N=2 experiments.
- 786 (C) SOX17-tdTomato positive population by flow analysis following PA-N, PA-FGF2 (5ng/ml), PA-  
787 FGF2 (25ng/ml), PA-FGF2 (250ng/ml) treatments. Mean from N=2 experiments.
- 788 (D) Flow cytometry analysis of OCT4-eGFP and SOX17-tdTomato expression following PA-N, PA-  
789 Chiron (3  $\mu$ M), and PA-Activin A (100ng/ml) treatments.
- 790 (E) SOX17-tdTomato positive population following PA-N, PA-Chiron (3  $\mu$ M), and PA-Activin A  
791 (100ng/ml) treatments. Mean from N=3 experiments
- 792 (F) Flow cytometry analysis of OCT4-eGFP and SOX17-tdTomato expression in indicated  
793 differentiation conditions, showing a reduced OCT4+ positive population in A83 and a reduced  
794 double negative(TE) population in XAV compared to PA-N.
- 795 (G) Bulk RNA-seq heatmap showing expression of genes in cells in the PA-FA83X timecourse.  
796 niPSC OS1 cells were collected for RNA-seq from bulk cultures in PXGL and 24 hrs treatment  
797 with PDA83. Following PDA83 withdrawal, cells were moved to FA83X. SOX17-tomato positive  
798 cells were flow sorted and collected for RNA-seq following 24 hrs (day 2) and 48 hrs (day3)  
799 treatment with FA83X.
- 800 (H) Immunostaining for indicated markers in HNES1 GATA3:mkO2 culture following PA-FA83X  
801 treatment. Scale Bar = 20  $\mu$ M
- 802 (I) Schematic illustration of blastoid formation in control condition or with FA83X.
- 803 (J) Confocal imaging of immunostained Day 4 blastoid formed with FA83X treatment. Scale Bar =  
804 20  $\mu$ M. Images show a maximum intensity projection of selected z-stacks.
- 805 (K) Quantification of hypoblast (FOXA2+), epiblast (OCT4+) and Hypoblast/Total ICM ratio in Day  
806 4 blastoids formed in control or FA83 treatment conditions.

807

808 Supplemental Figure 6: Marker expression analysis in embryos and in naïve PSC differentiation

- 809 (A) Single cell heatmap showing expression of genes in Leiden clusters annotated as Early  
810 Hypoblast, Late Hypoblast, and Extraembryonic mesoderm in UMAP in Figure 5B.
- 811 (B) Pseudo-temporal ordering of selected genes (ordered from 1 (FGFR2) to 25 (COL4A5)) along  
812 hypoblast branch in human embryo UMAP embedding.

813 (C) Expression of genes as in (B) in combined PA-N and PA-FA83X UMAP subsetted to naïve  
814 epiblast, transitional ICM, early hypoblast, and late hypoblast.

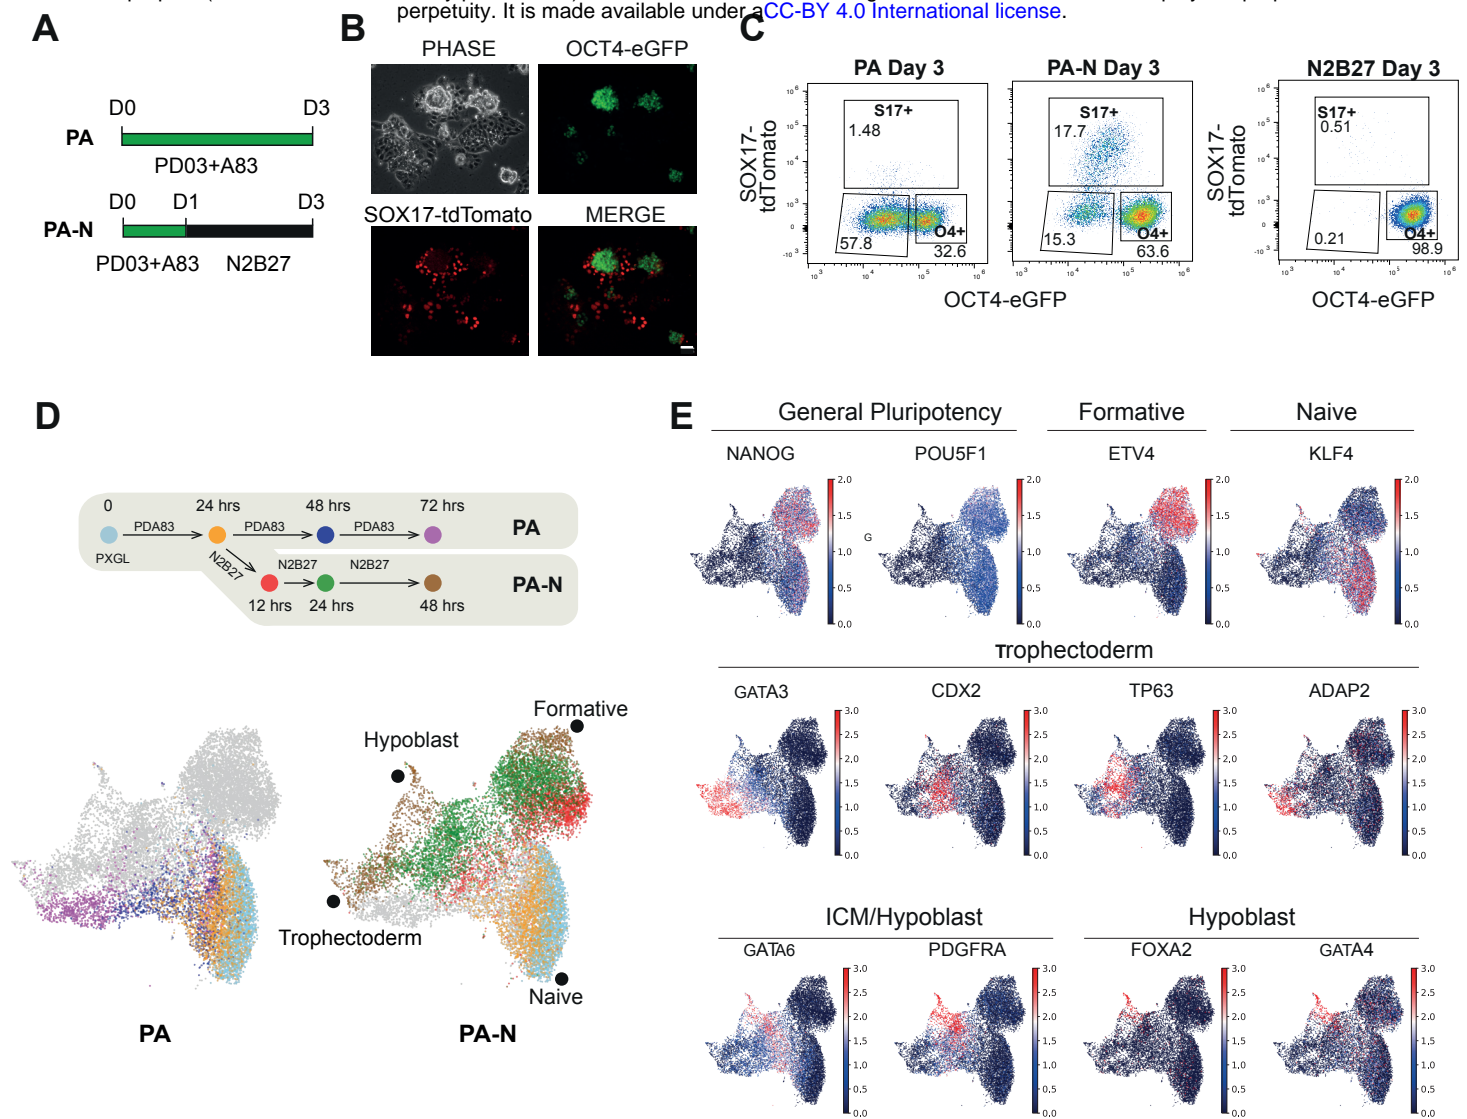

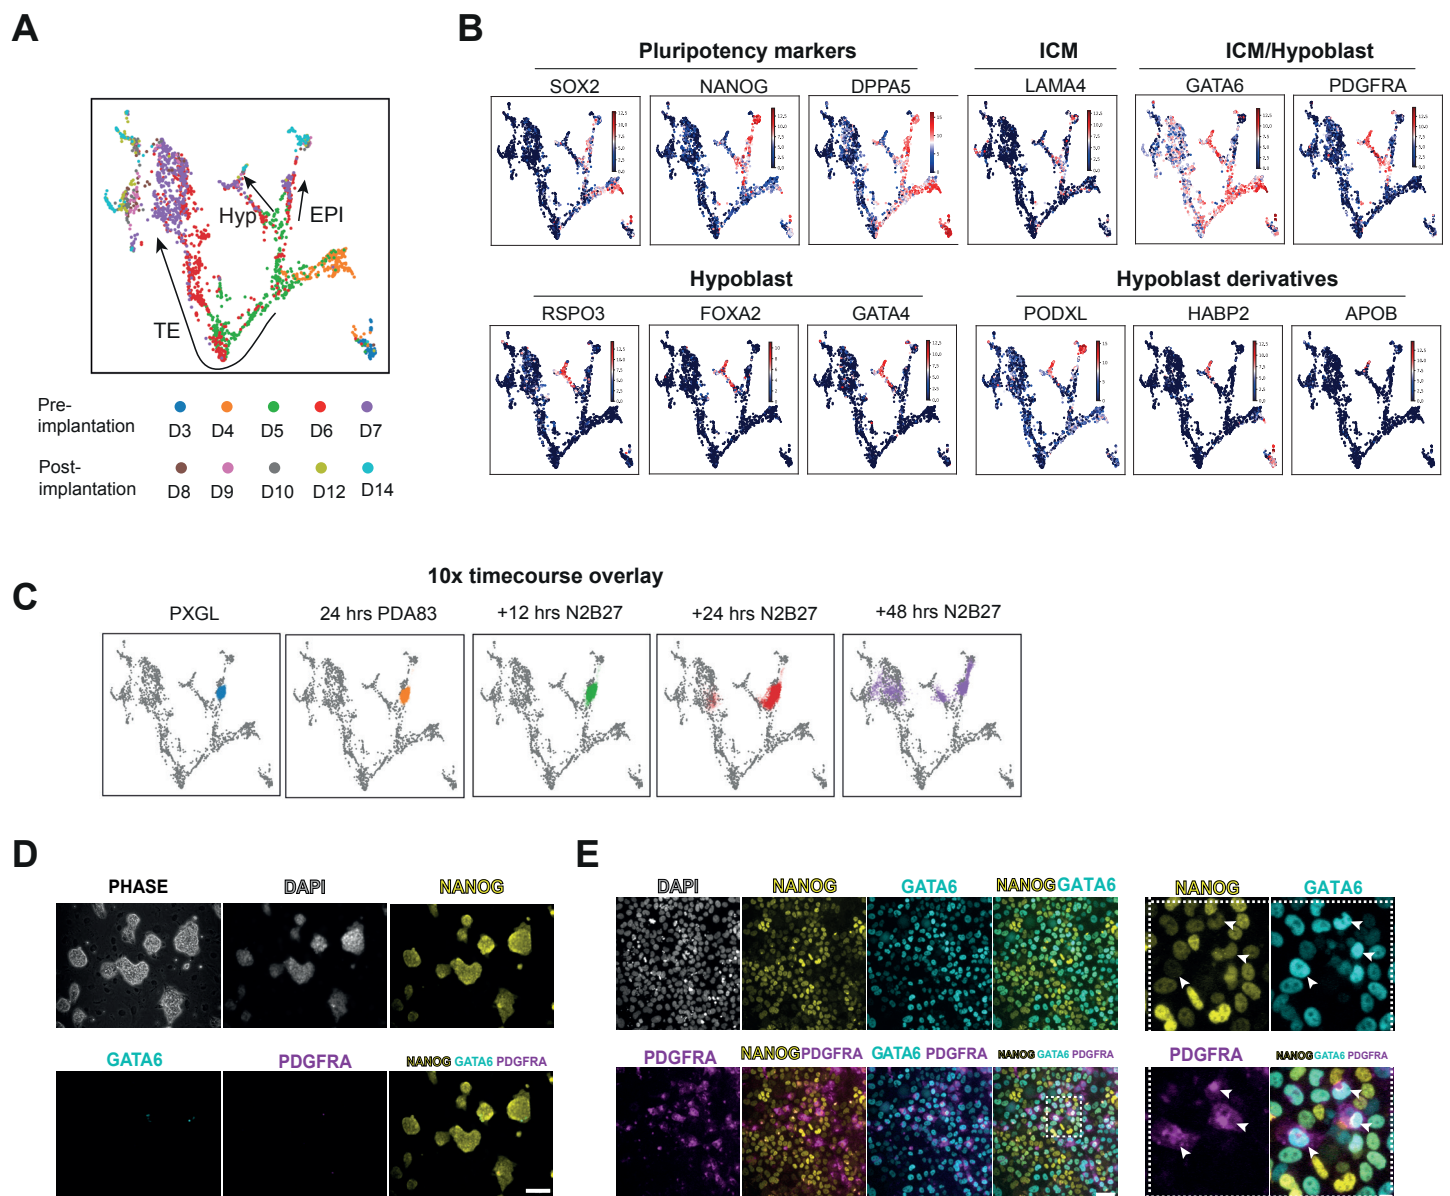

**Figure 2**

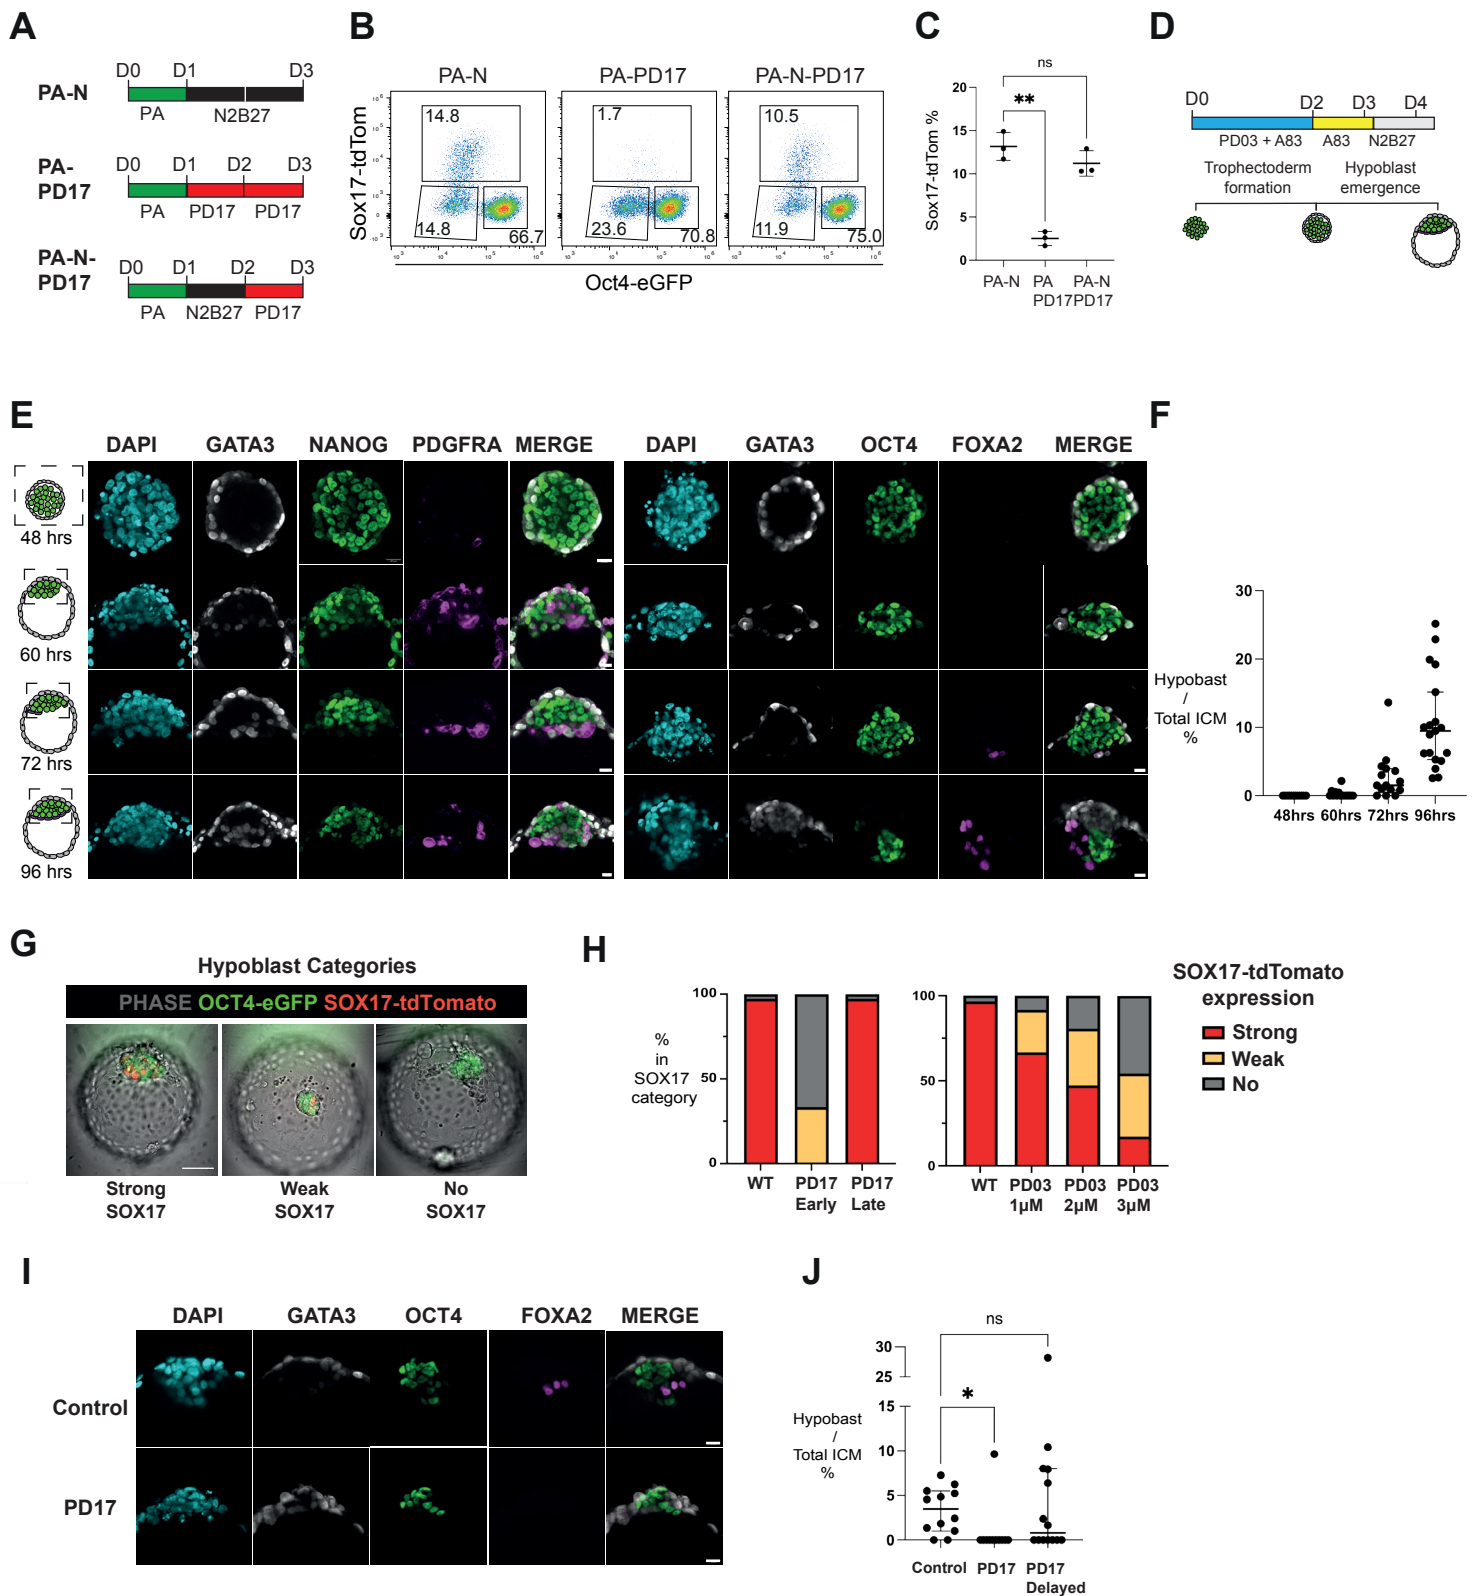

**Figure 3**



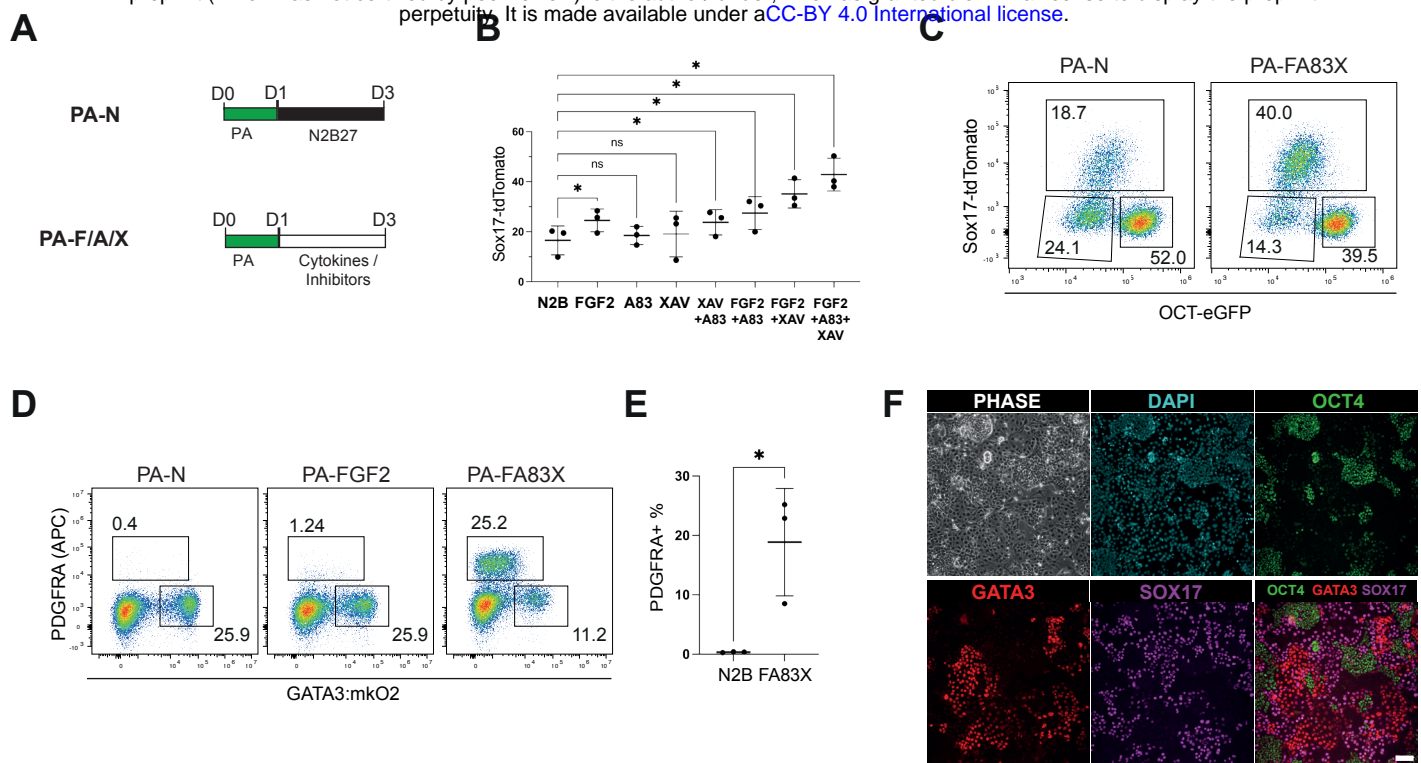

**Figure 4**

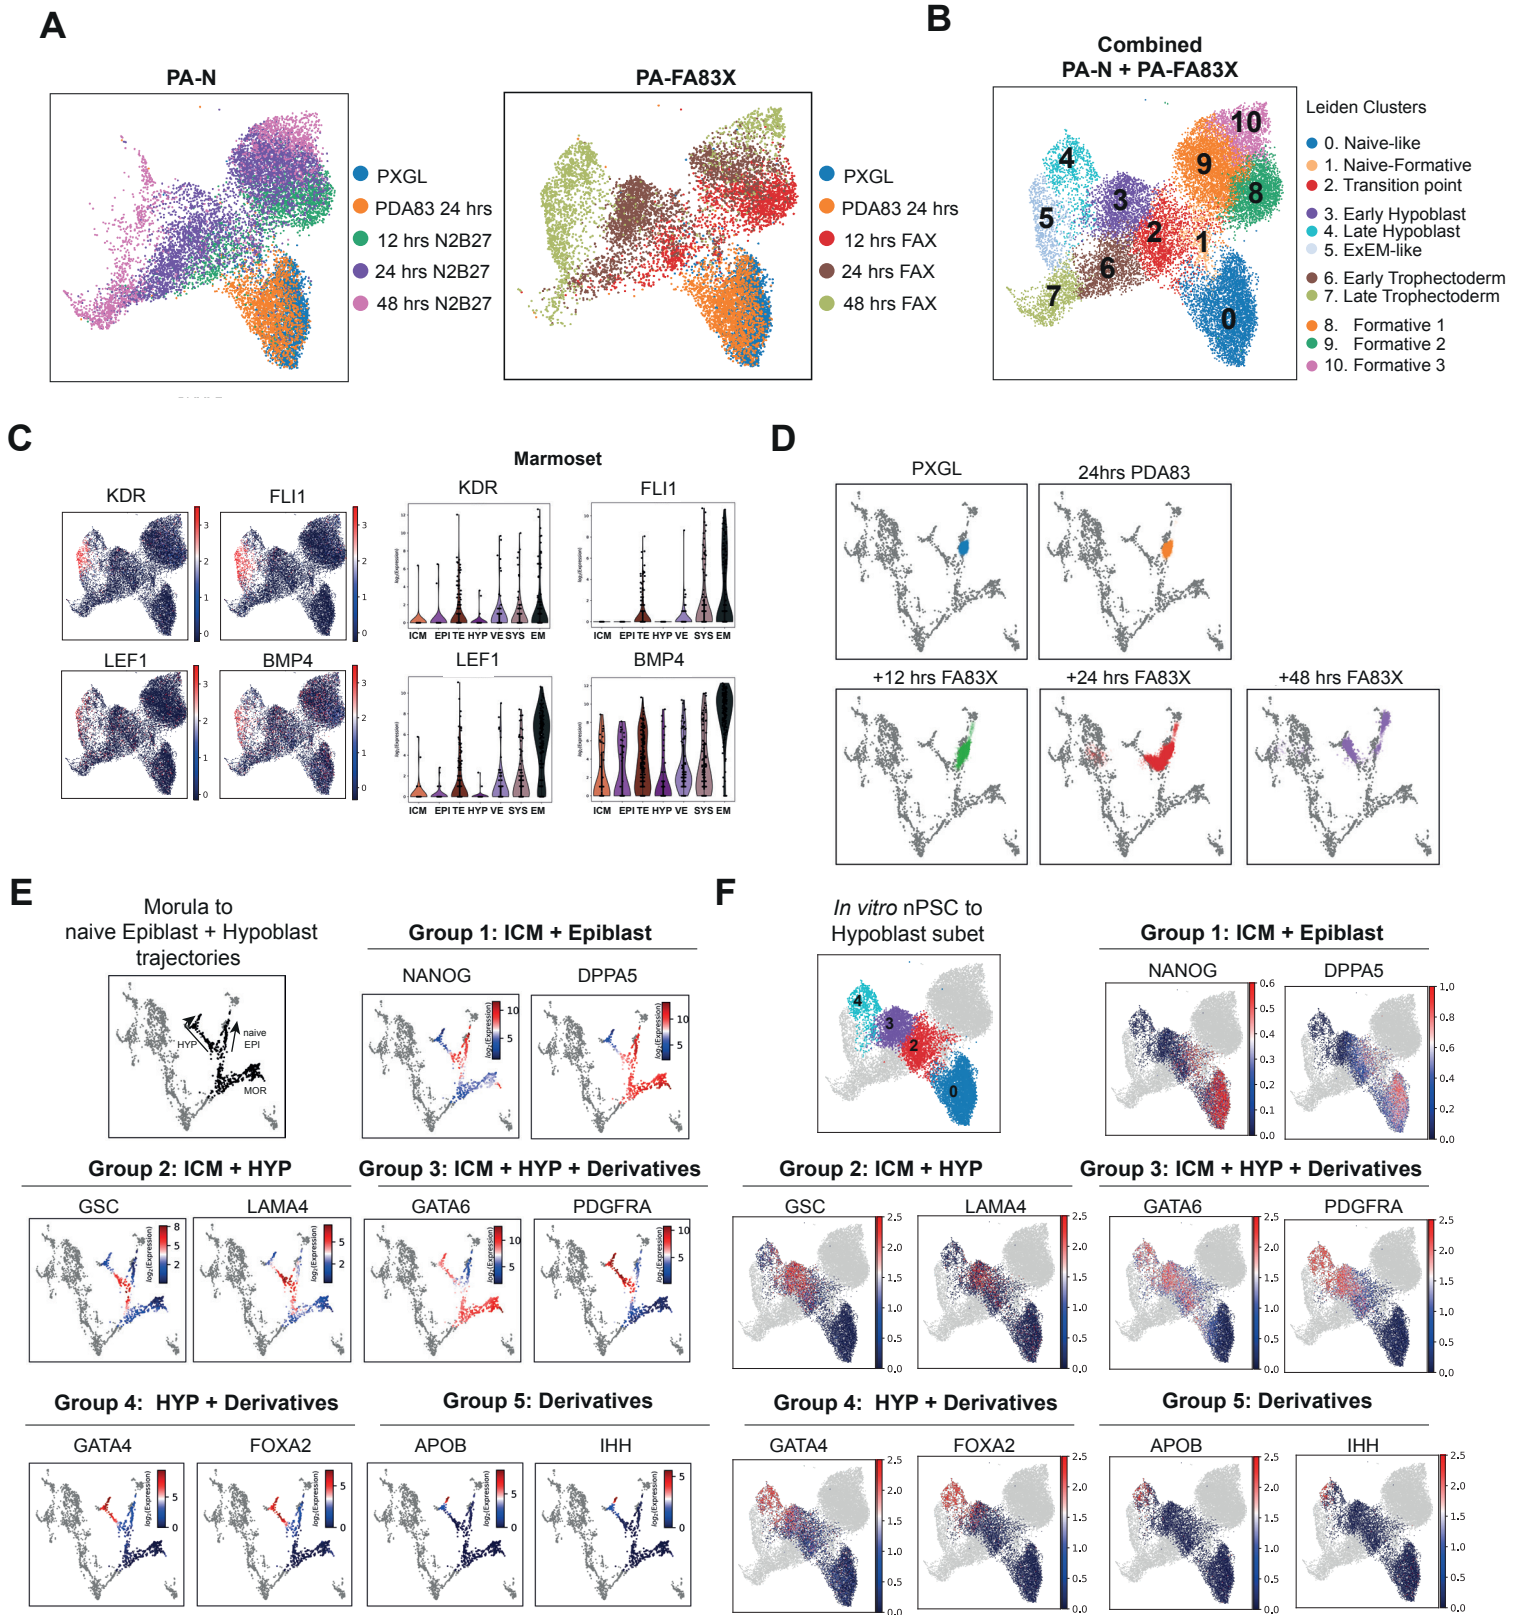

**Figure 5**
